# Supplementary material for: Photolatent ring-opening metathesis polymerization in miniemulsion: a powerful approach to produce polynorbornene latexes
Source: Royal Society of Chemistry journal article supplement (doi:10.1039/c8py01011k), 2018-01-01
Supplement: c8py01011k1.pdf [file c8py01011k1.pdf]

# Supplementary information for: Photolatent Ring-Opening Metathesis Polymerization in Miniemulsion: a Powerful Approach to Produce Polynorbornene Latexes

Loïc Pichavant<sup>1</sup>, Patrick Lacroix-Desmazes<sup>2</sup>, Abraham Chemtob<sup>3,4</sup>, Julien Pinaud<sup>2</sup>, and Valérie Héroguez<sup>1\*</sup>

<sup>1</sup> Laboratoire de Chimie des Polymères Organiques, CNRS UMR5629, IPB-ENSCBP, Université de Bordeaux, Pessac, France

<sup>2</sup> ICGM Université de Montpellier, CNRS, ENSCM, Montpellier, France

<sup>3</sup> Université de Haute-Alsace, CNRS, IS2M UMR7361, F-68100 Mulhouse, France

<sup>4</sup> Université de Strasbourg, France

CORRESPONDING AUTHOR Valérie Héroguez, Université de Bordeaux, LCPO, UMR 5629, F-33600 Pessac, France. CNRS, LCPO, UMR 5629, F-33600 Pessac, France

Tel: +33 (0) 5 40 00 22 28

Fax: +33 (0) 5 40 00 84 87

Email: heroguez@enscbp.fr

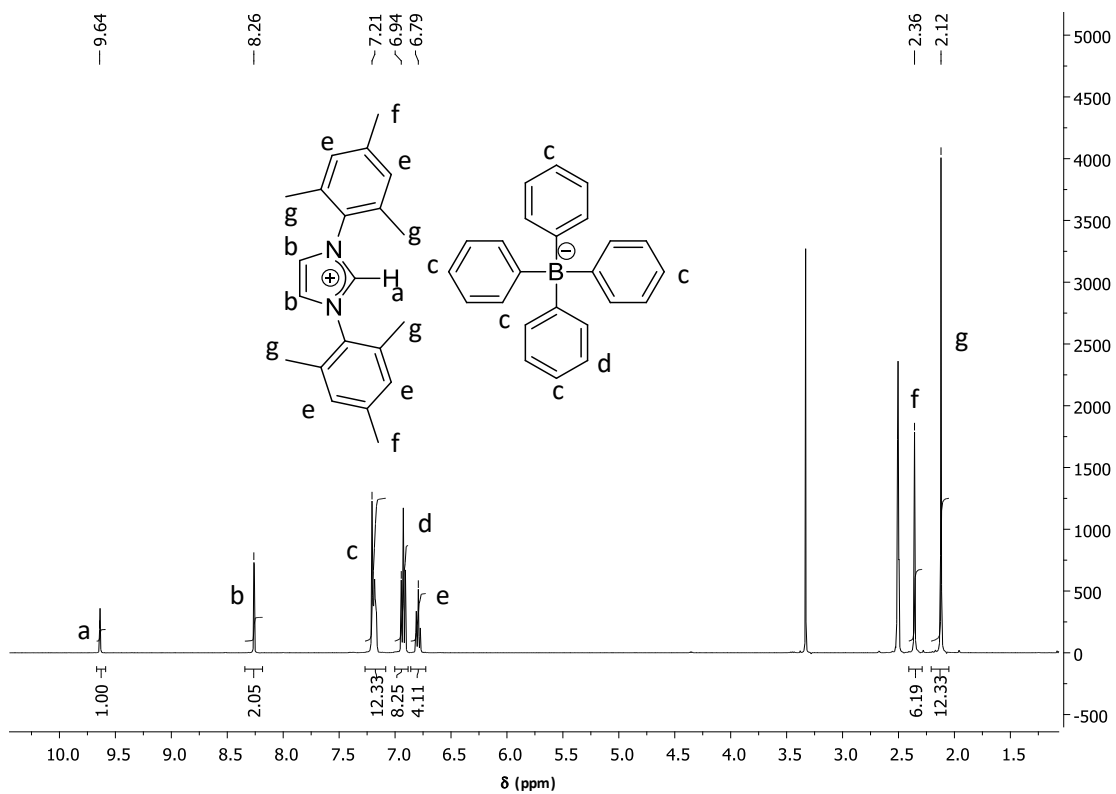

Figure S1:  $^1\text{H}$  NMR spectrum in  $\text{DMSO-}d_6$  of 1,3-Bis(mesityl)imidazolium tetraphenylborate

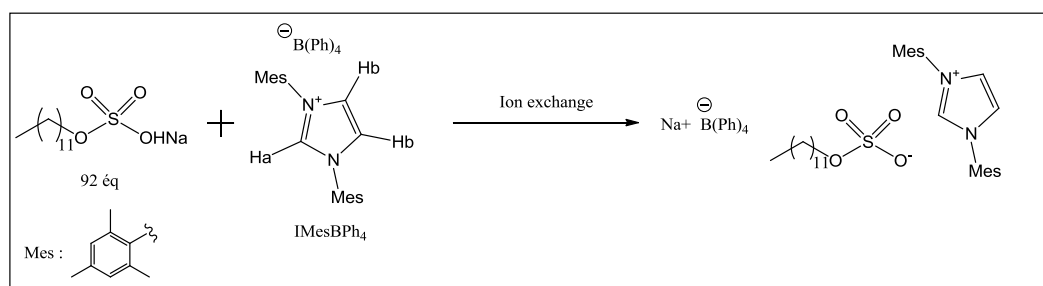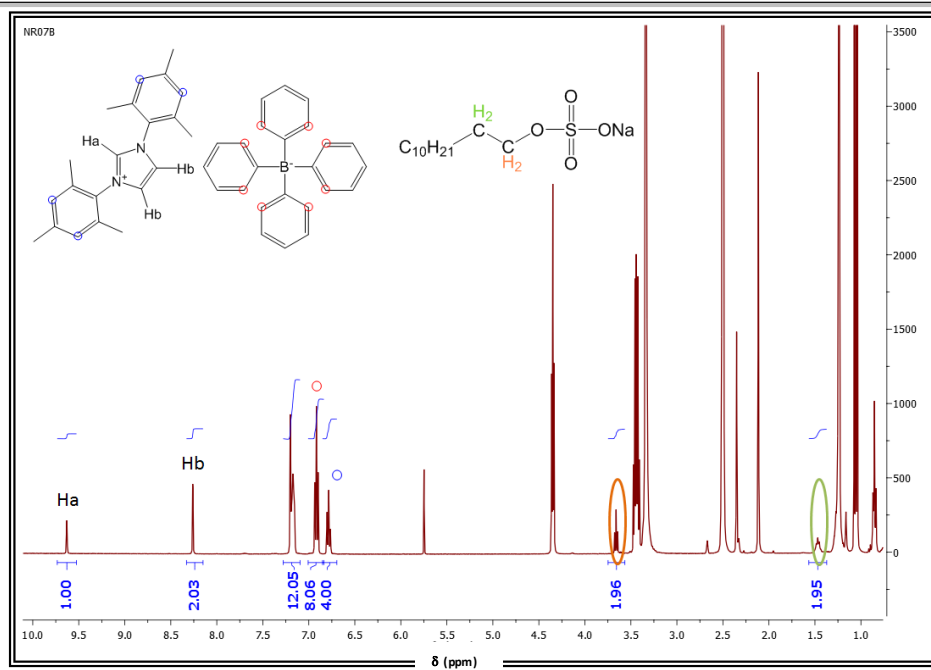

Figure S2: Ion exchange reaction between the NHC photogenerator IMesH<sup>+</sup>BPh<sub>4</sub><sup>-</sup> and sodium dodecyl sulfate and <sup>1</sup>H NMR spectrum in DMSO-d<sub>6</sub> of the formed precipitate

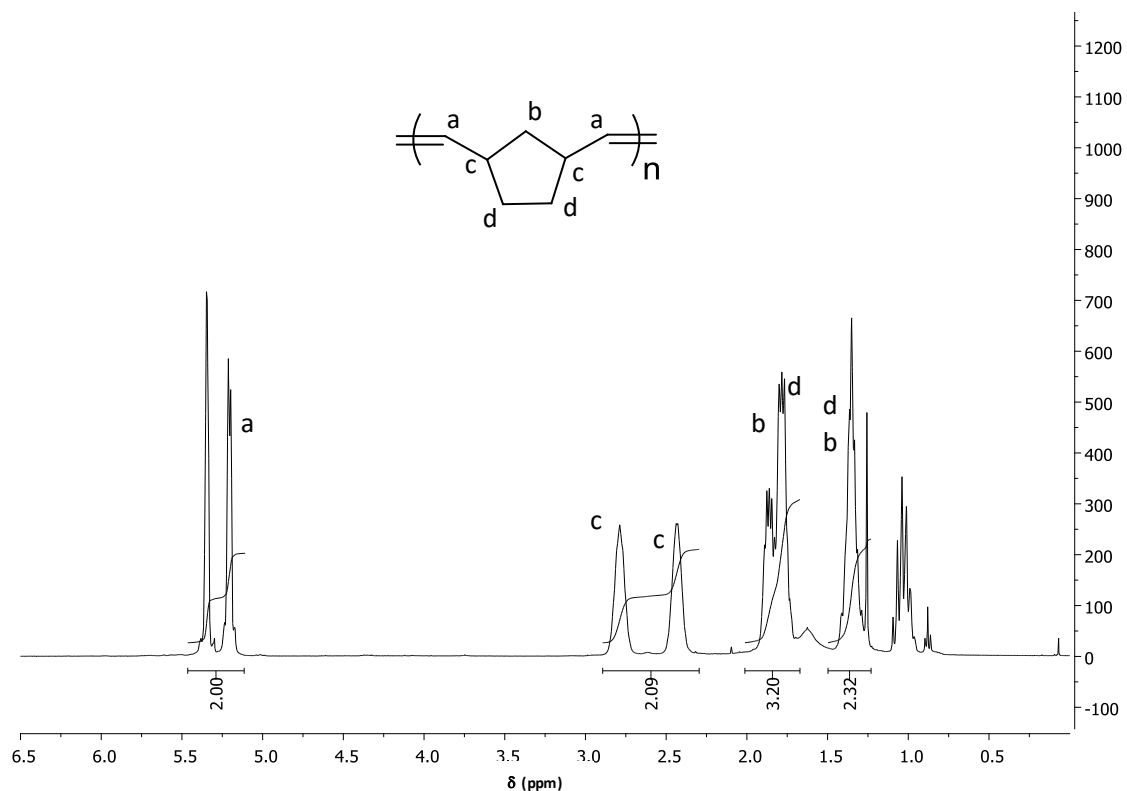

Figure S3:  $^1\text{H}$  NMR spectrum in  $\text{CDCl}_3$  of the polynorbornene obtained with the catalytic system  $\text{IMesBPh}_4/\text{ITX}/[\text{RuCl}_2(\text{pCy})]_2$  in solution (irradiation time: 15 min)

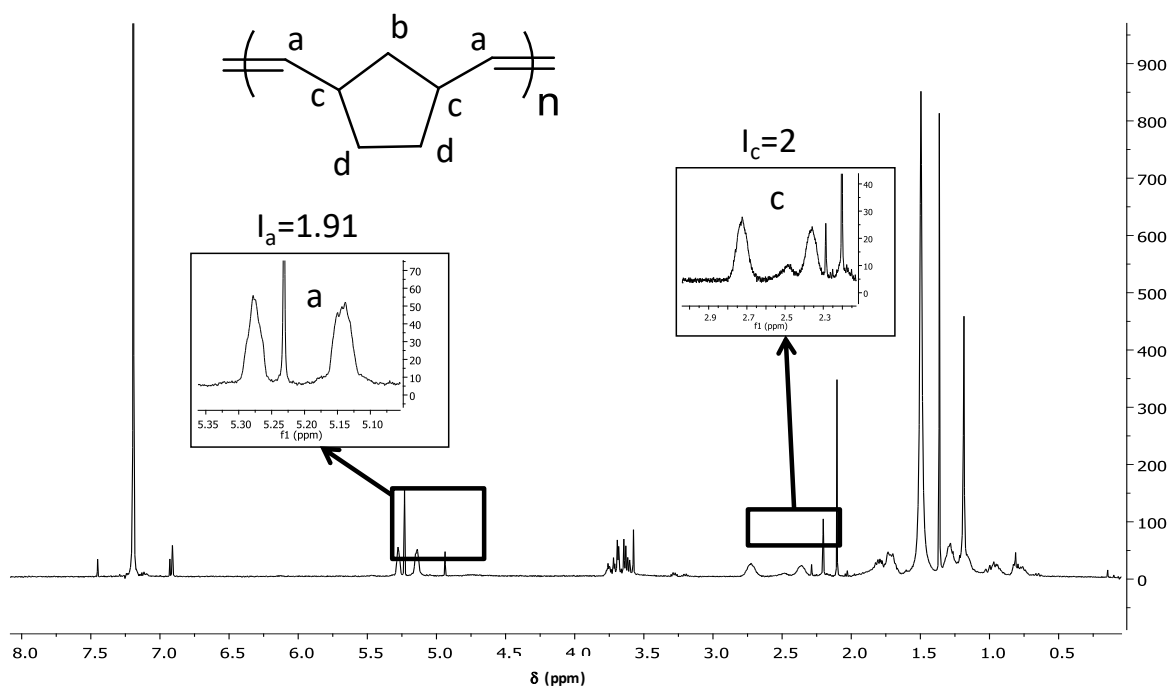

Figure S4:  $^1\text{H}$  NMR spectrum in  $\text{CDCl}_3$  of the polynorbornene obtained with the catalytic system  $\text{IMesBPh}_4/\text{ITX}/[\text{RuCl}_2(\text{pCy})]_2$  in miniemulsion 10 w/w-% (irradiation time: 15 min)

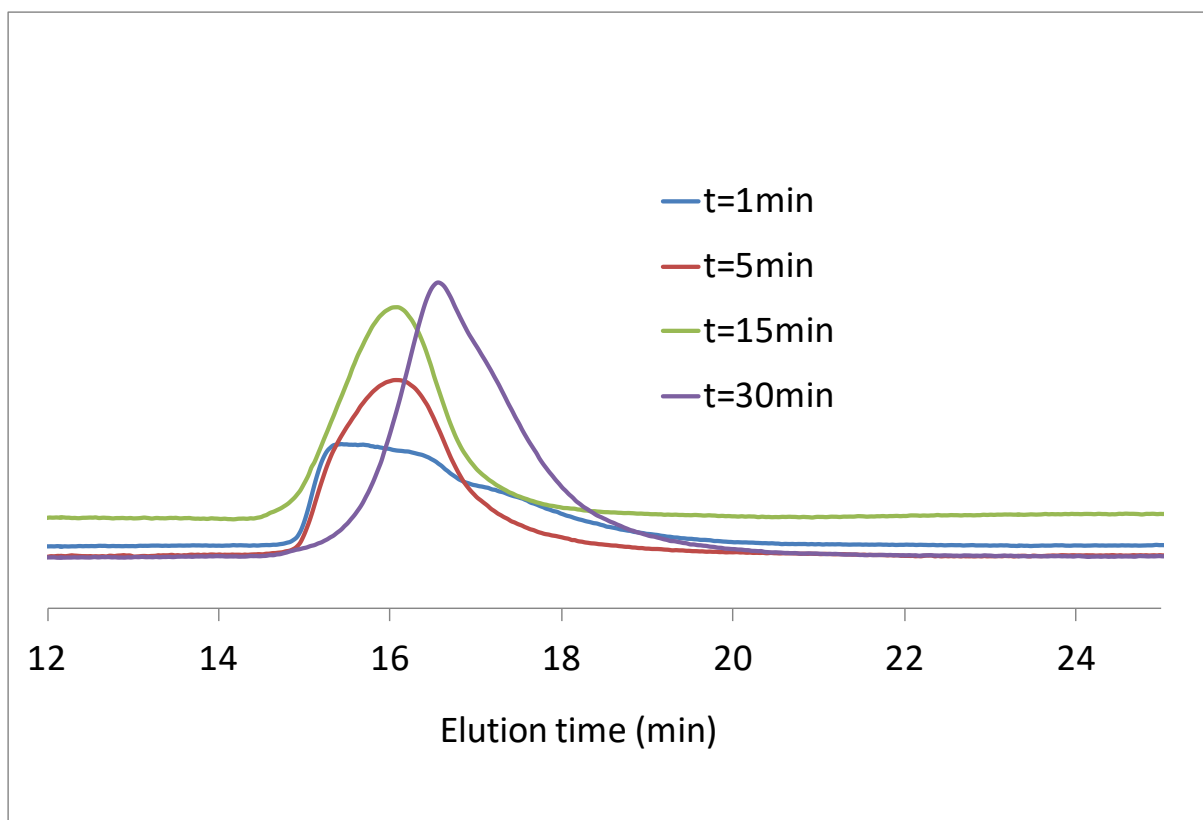

Figure S5: Examples of SEC traces for polymers obtained in solution (catalytic system IMesBPh<sub>4</sub>/ITX/[RuCl<sub>2</sub>(pCy)]<sub>2</sub>)

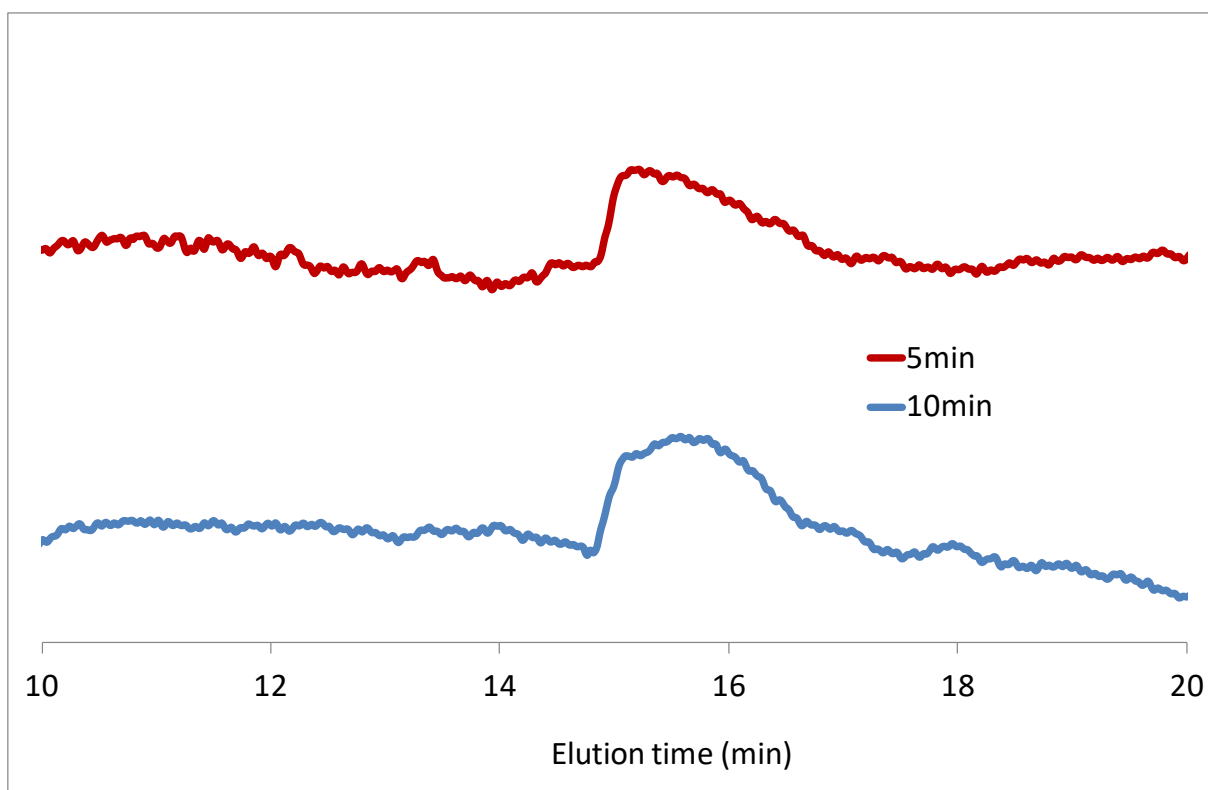

Figure S6: Examples of SEC traces for polymers obtained in miniemulsion 10 w/w-% (catalytic system IMesBPh<sub>4</sub>/ITX/[RuCl<sub>2</sub>(pCy)]<sub>2</sub>)

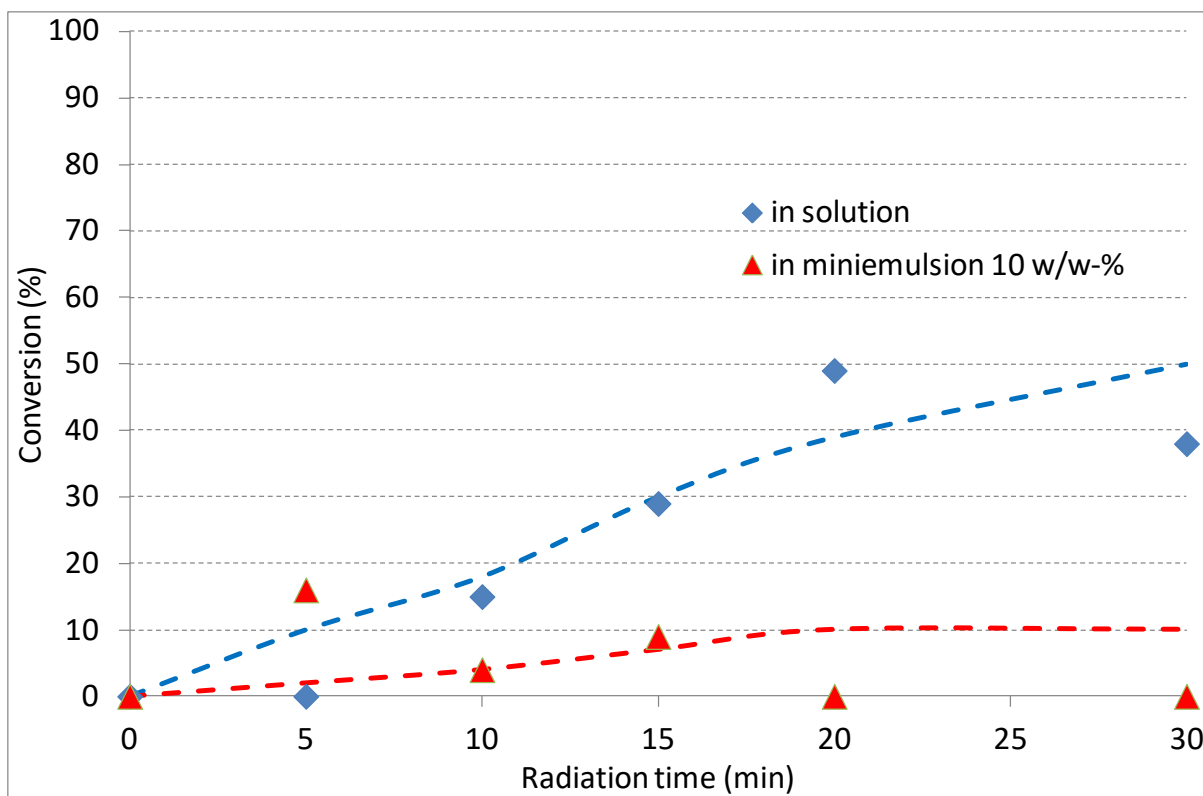

Figure S7: Nb conversion as a function of the irradiation time with  $[\text{RuCl}_2(\text{pCy})]_2$  alone (without  $\text{IMesH}^+\text{BPh}_4^-/\text{ITX}$ ) in solution (blue curve) and in miniemulsion 10 w/w-% (red curve)
